# Supplementary material for: Optimizing Text Messages to Promote Engagement With Internet Smoking Cessation Treatment: Results From a Factorial Screening Experiment
Source: PubMed Central journal article supplement (PMC7386536; doi:10.2196/17734), 2020-04-02

# Set Quit Date: Person x Integration x Tailoring x Intensity

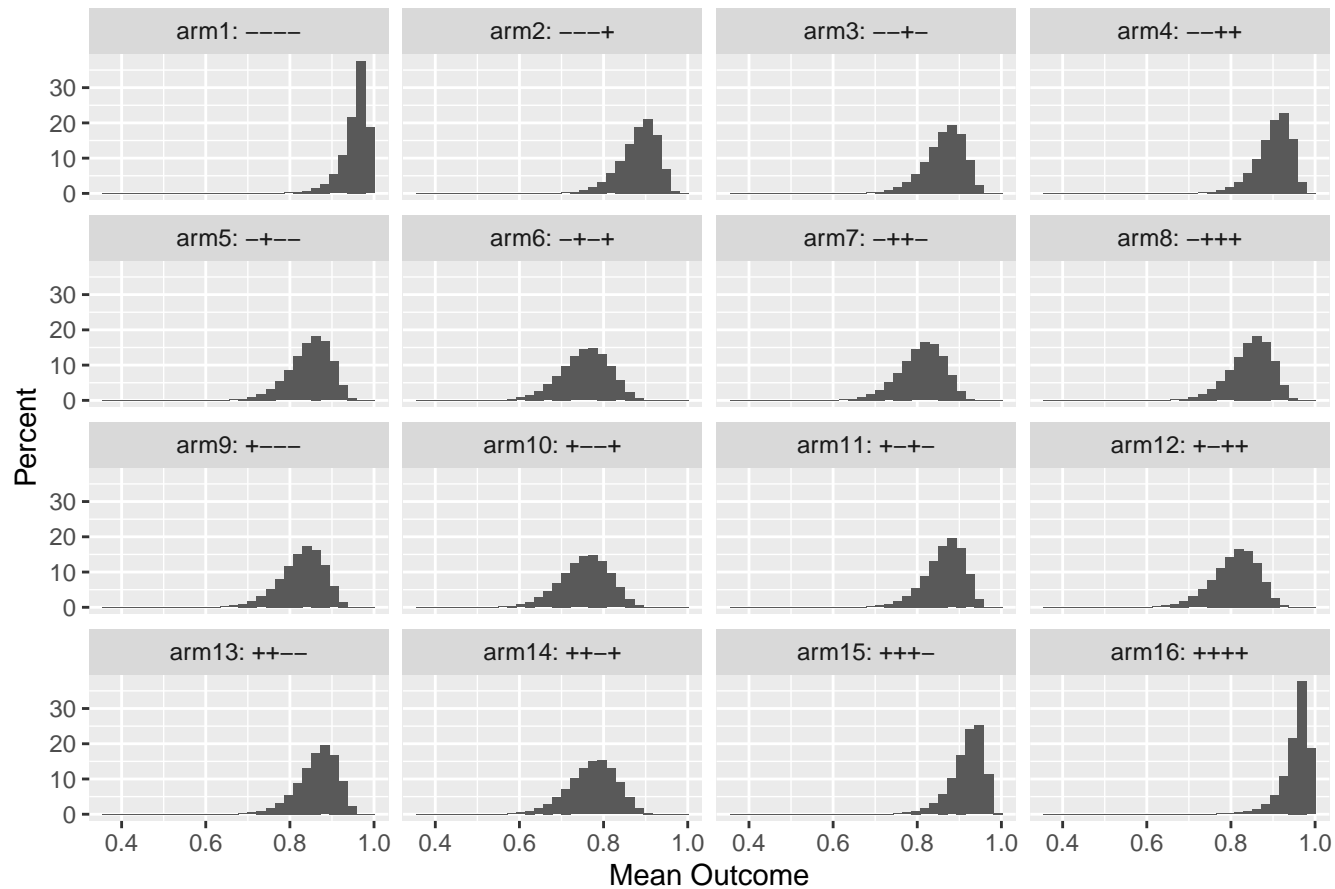

# Choose Quit Smoking Aid: Person x Integration x Tailoring x Intensity

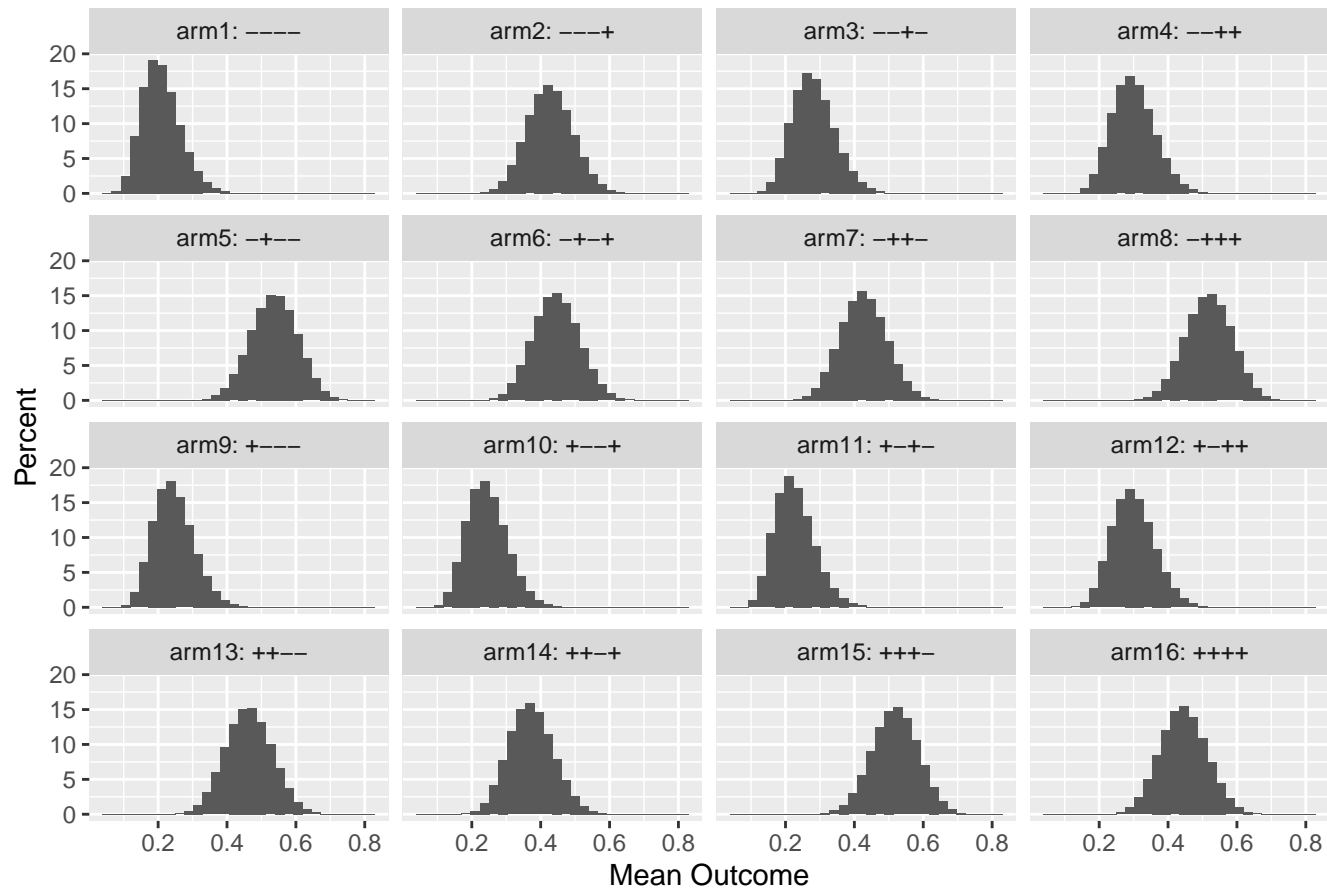

# Build Support System: Person x Integration x Tailoring x Intensity

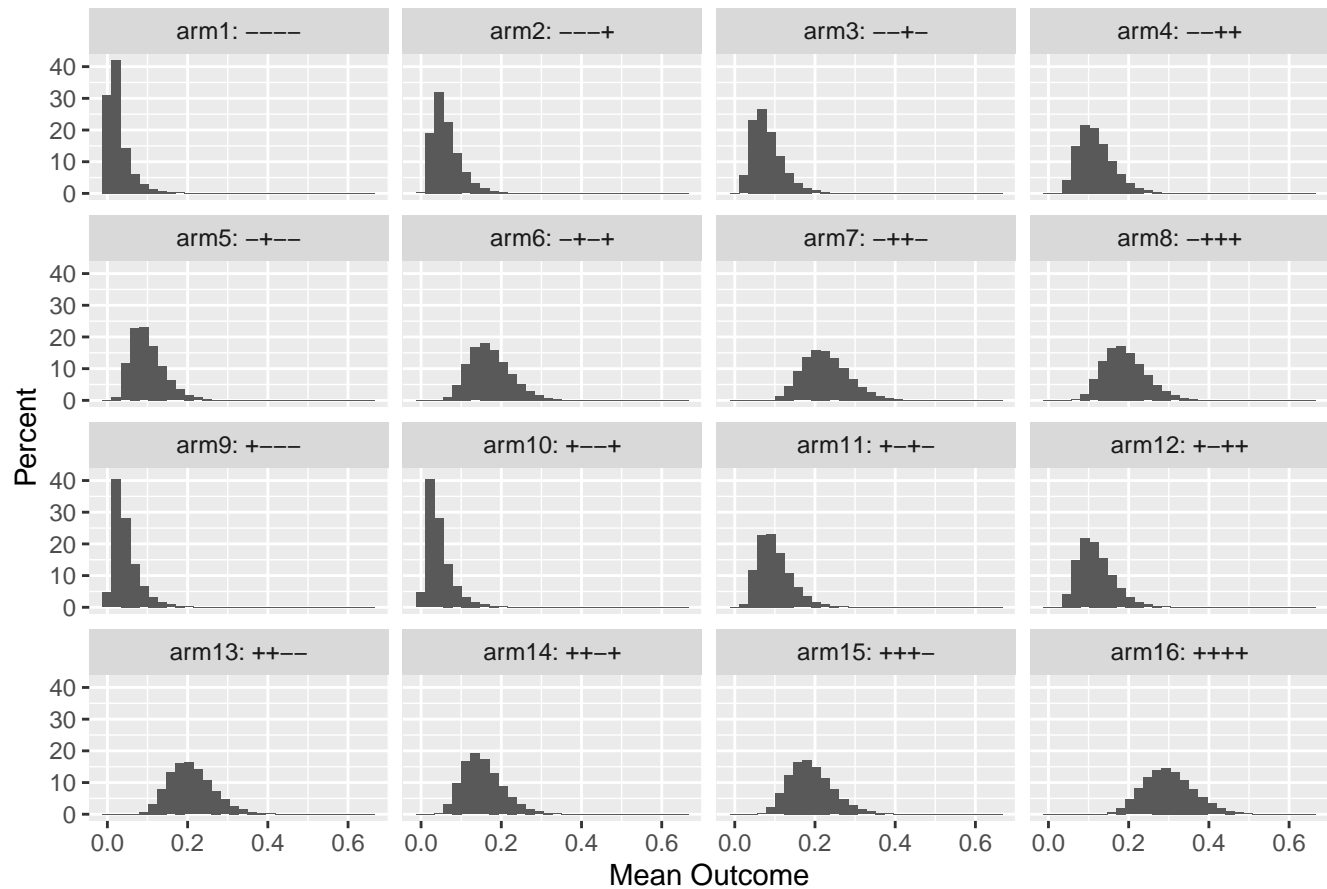

# Track Smoking Triggers: Person x Integration x Tailoring x Intensity

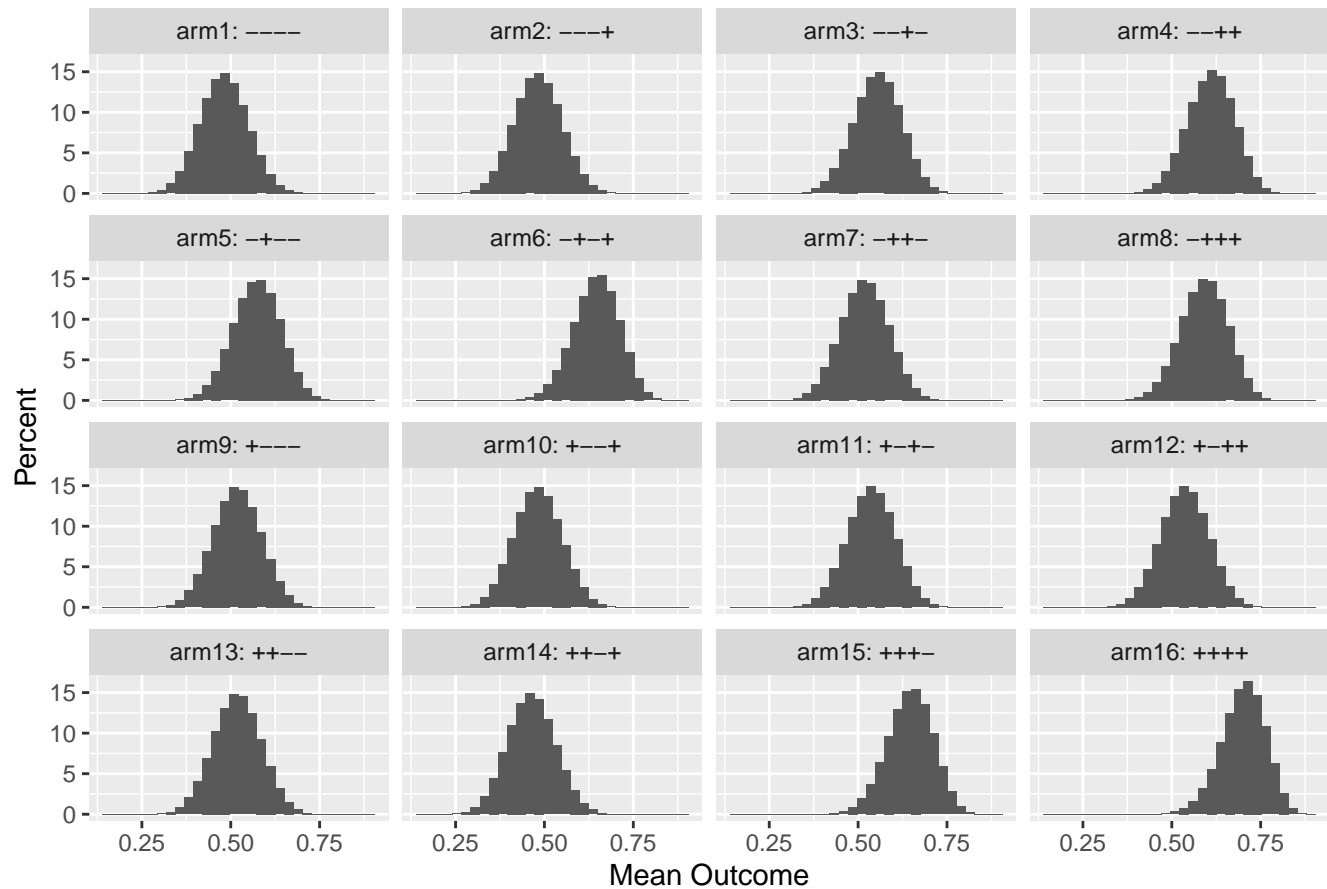

# Beat Smoking Triggers: Person x Integration x Tailoring x Intensity

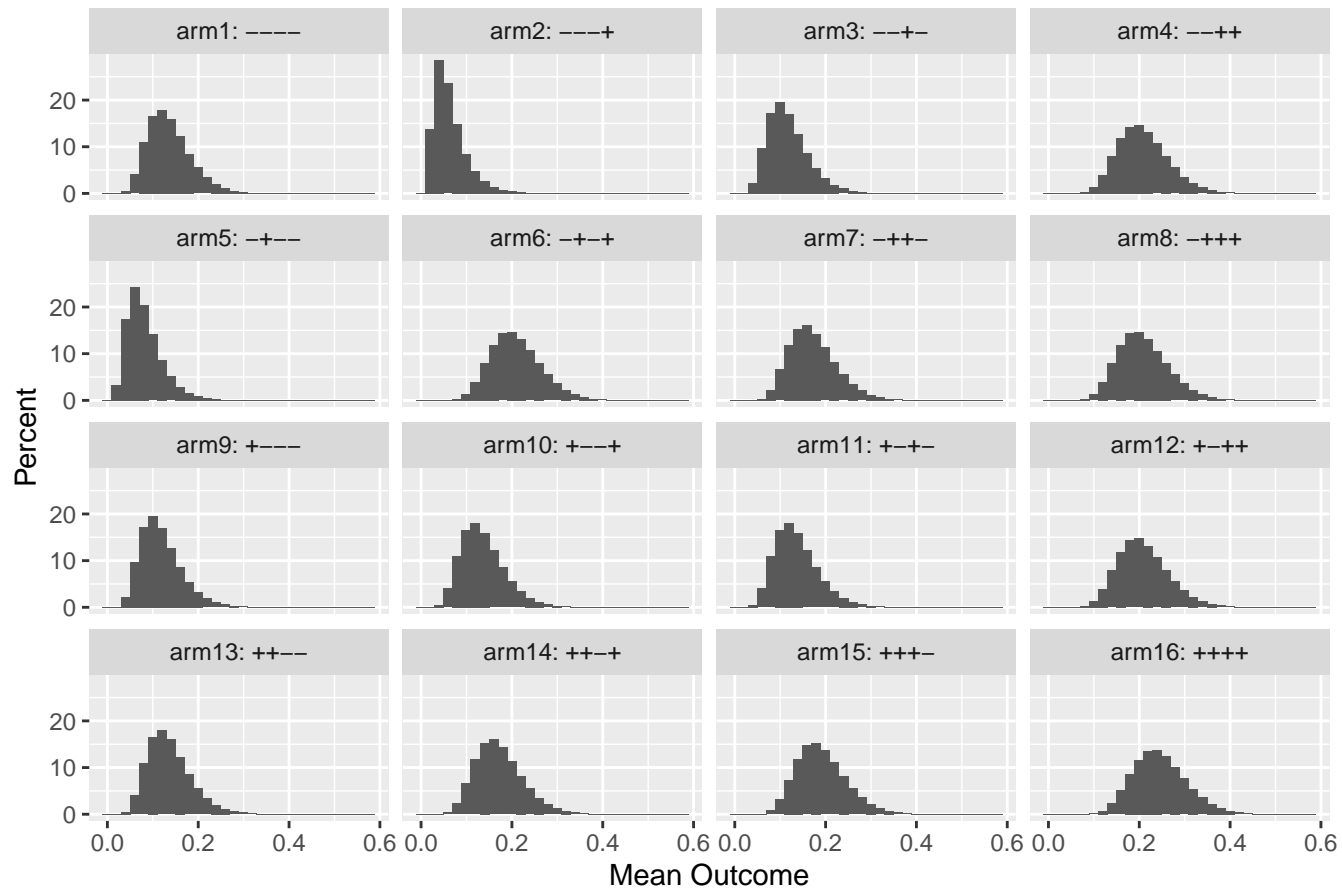

# Visit Community: Person x Integration x Tailoring x Intensity

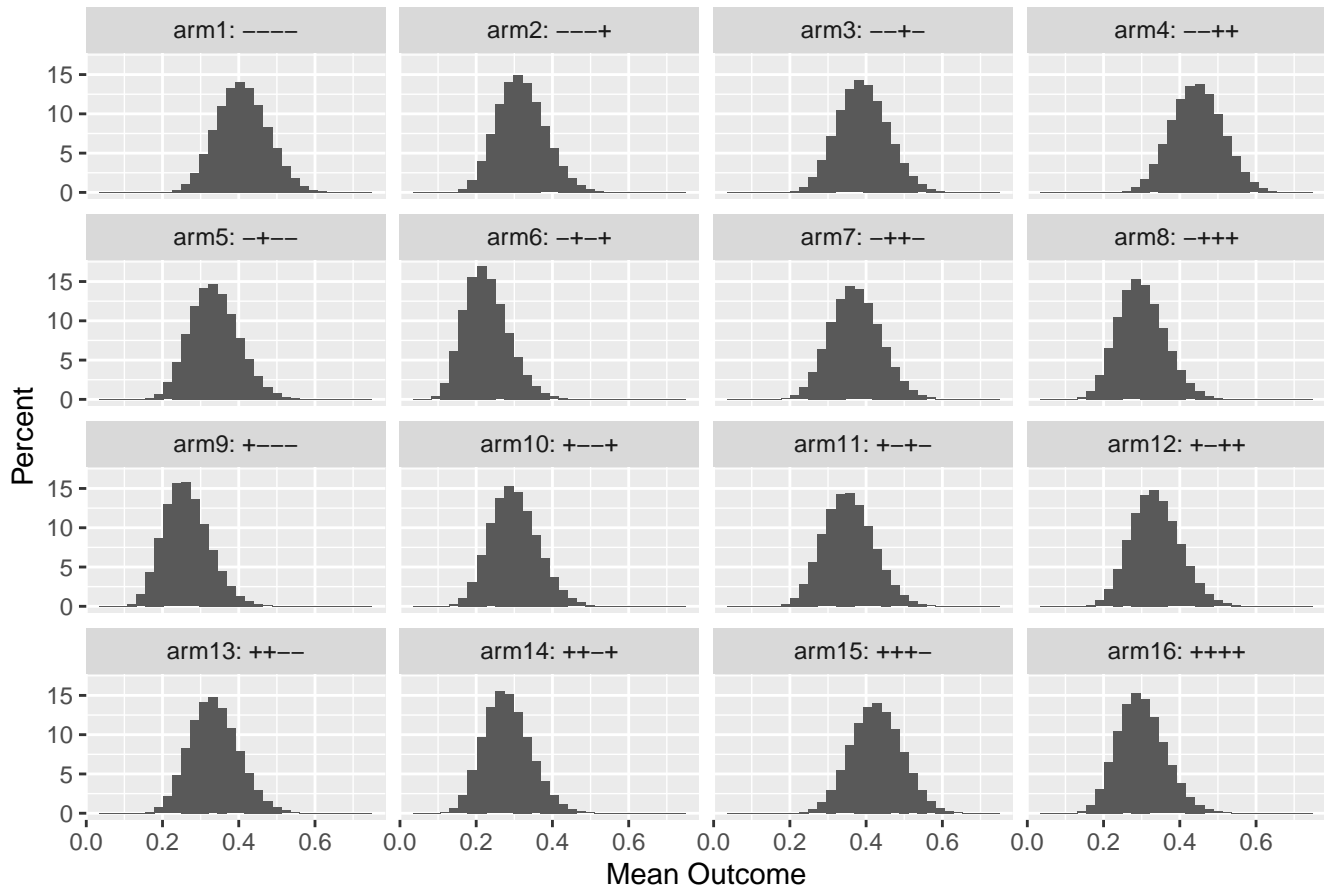

Supplement: jmir_v22i4e17734_app1.pdf [file jmir_v22i4e17734_app1.pdf]
