# Supplementary material for: Optimizing Text Messages to Promote Engagement With Internet Smoking Cessation Treatment: Results From a Factorial Screening Experiment
Source: PubMed Central journal article supplement (PMC7386536; doi:10.2196/17734), 2020-04-02

# Feature Utilization: Person x Integration x Tailoring x Intensity

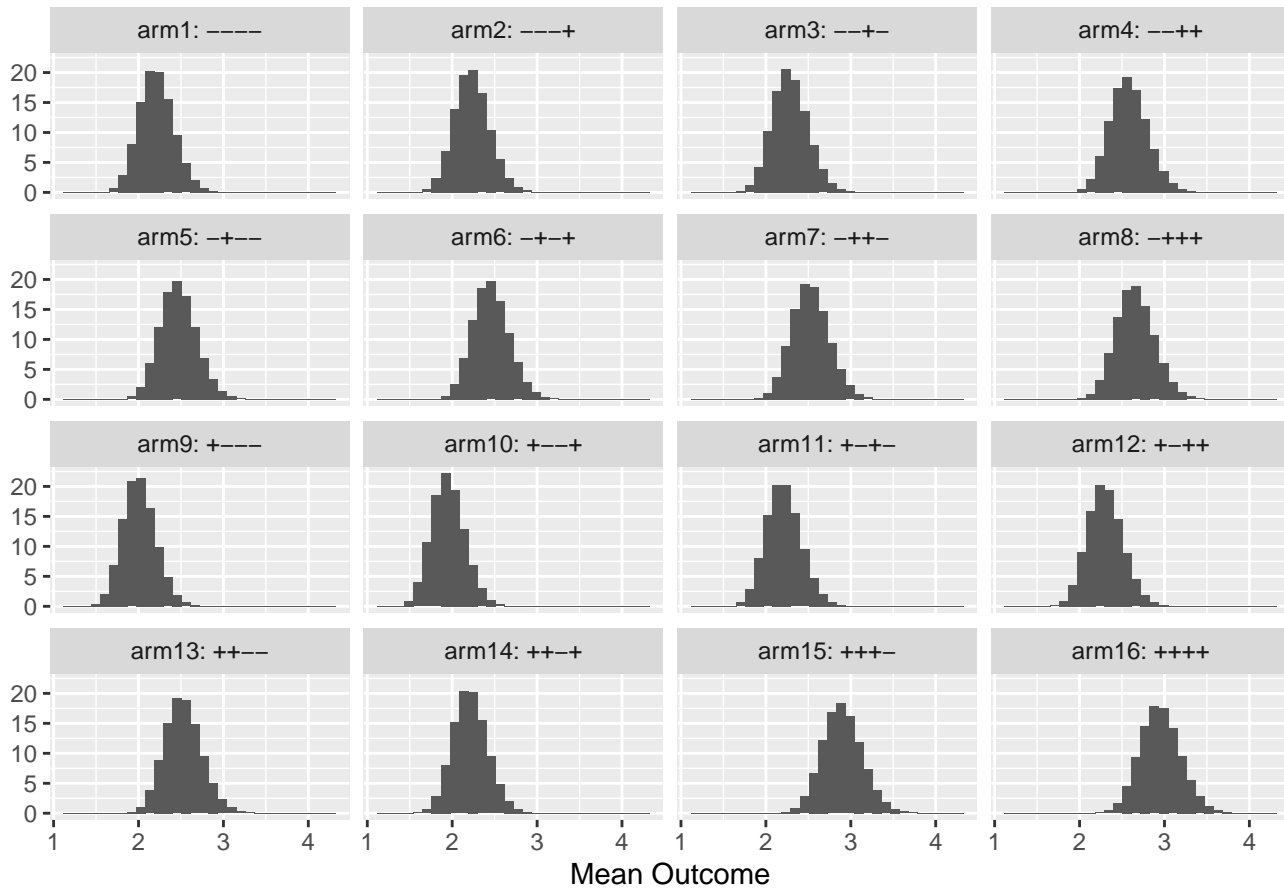

# Pageviews $\geq 25$ : Person x Integration x Tailoring x Intensity

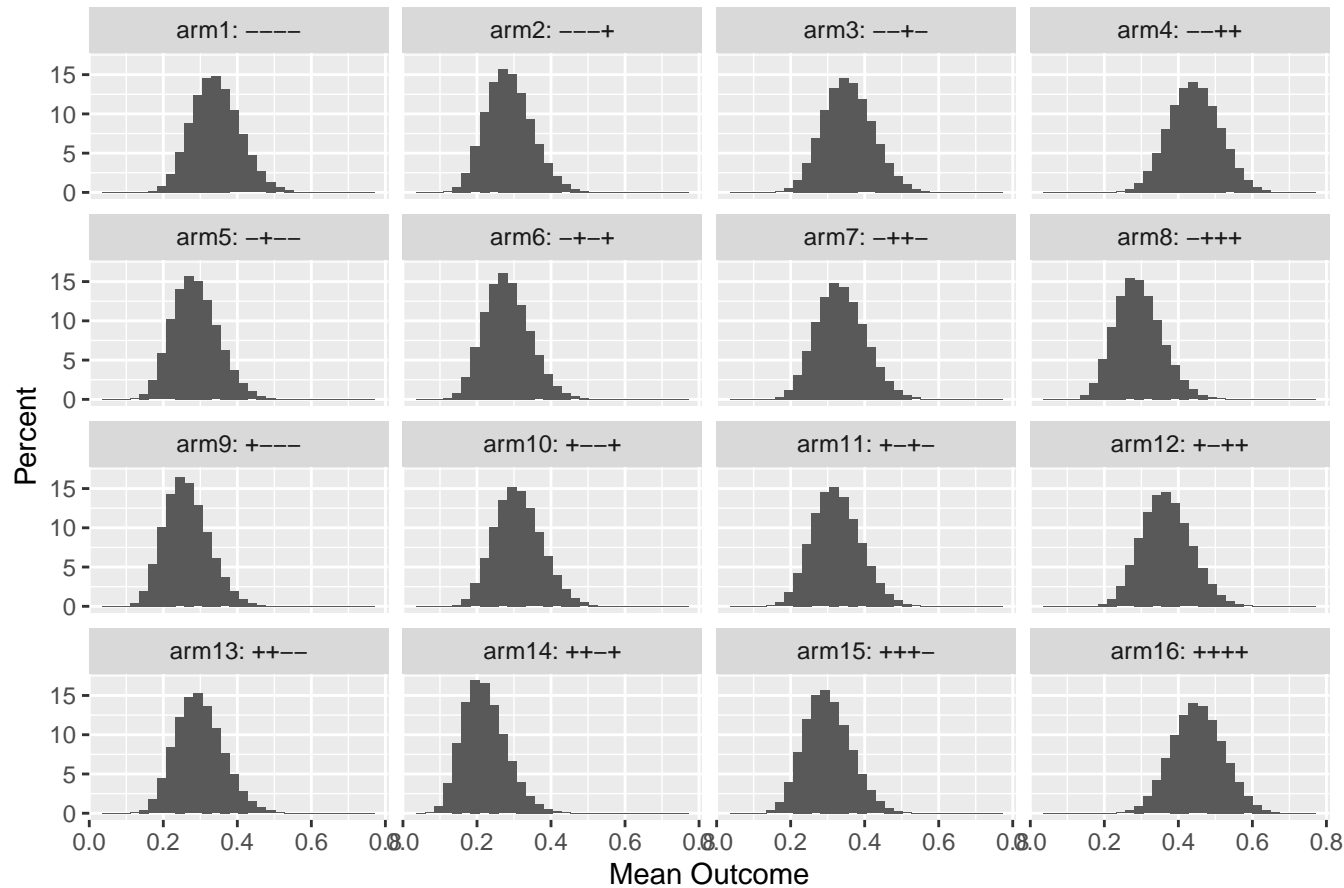

# Time on Site $\geq$ 15 mins: Person x Integration x Tailoring x Intensity

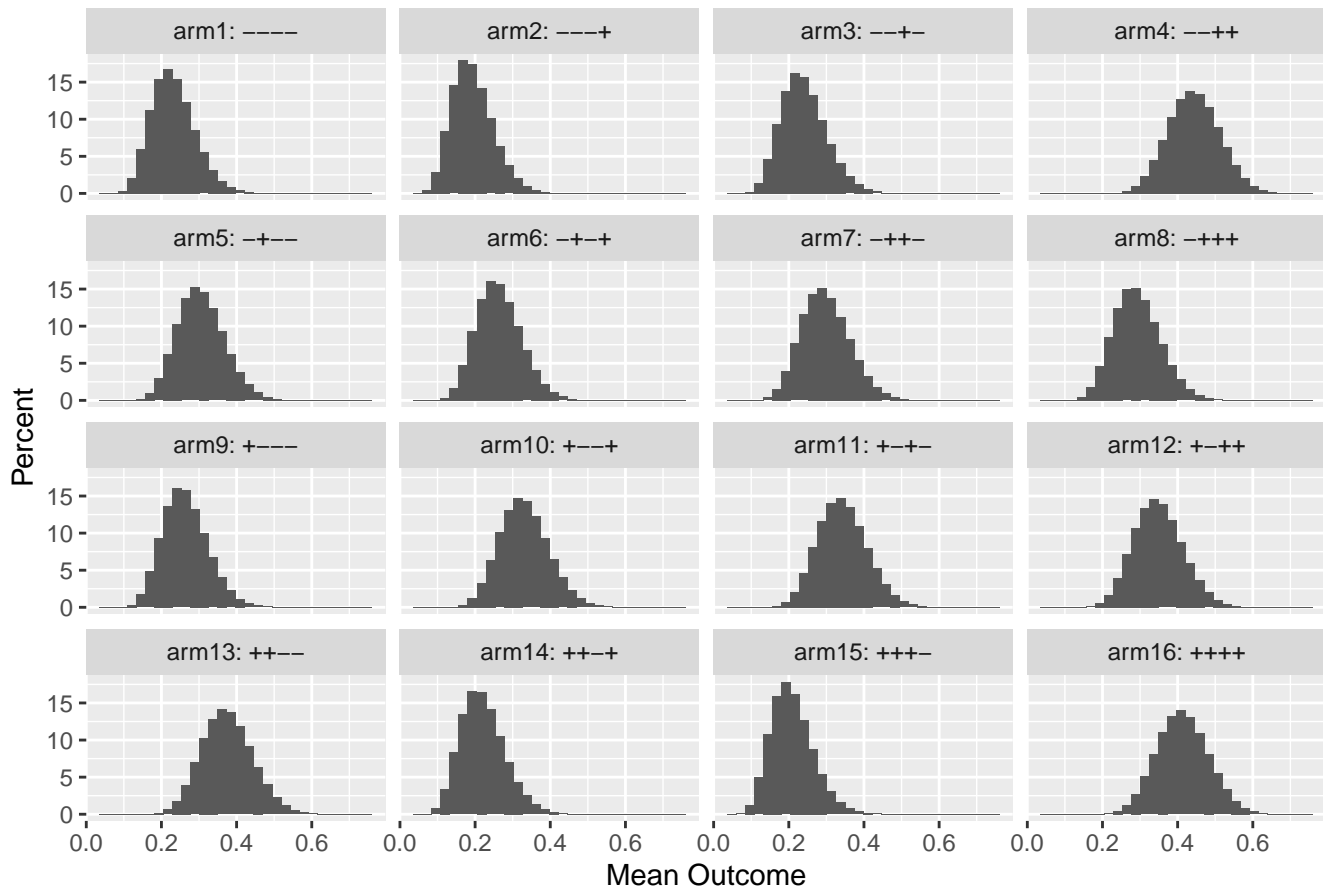

# Returned to Website: Person x Integration x Tailoring x Intensity

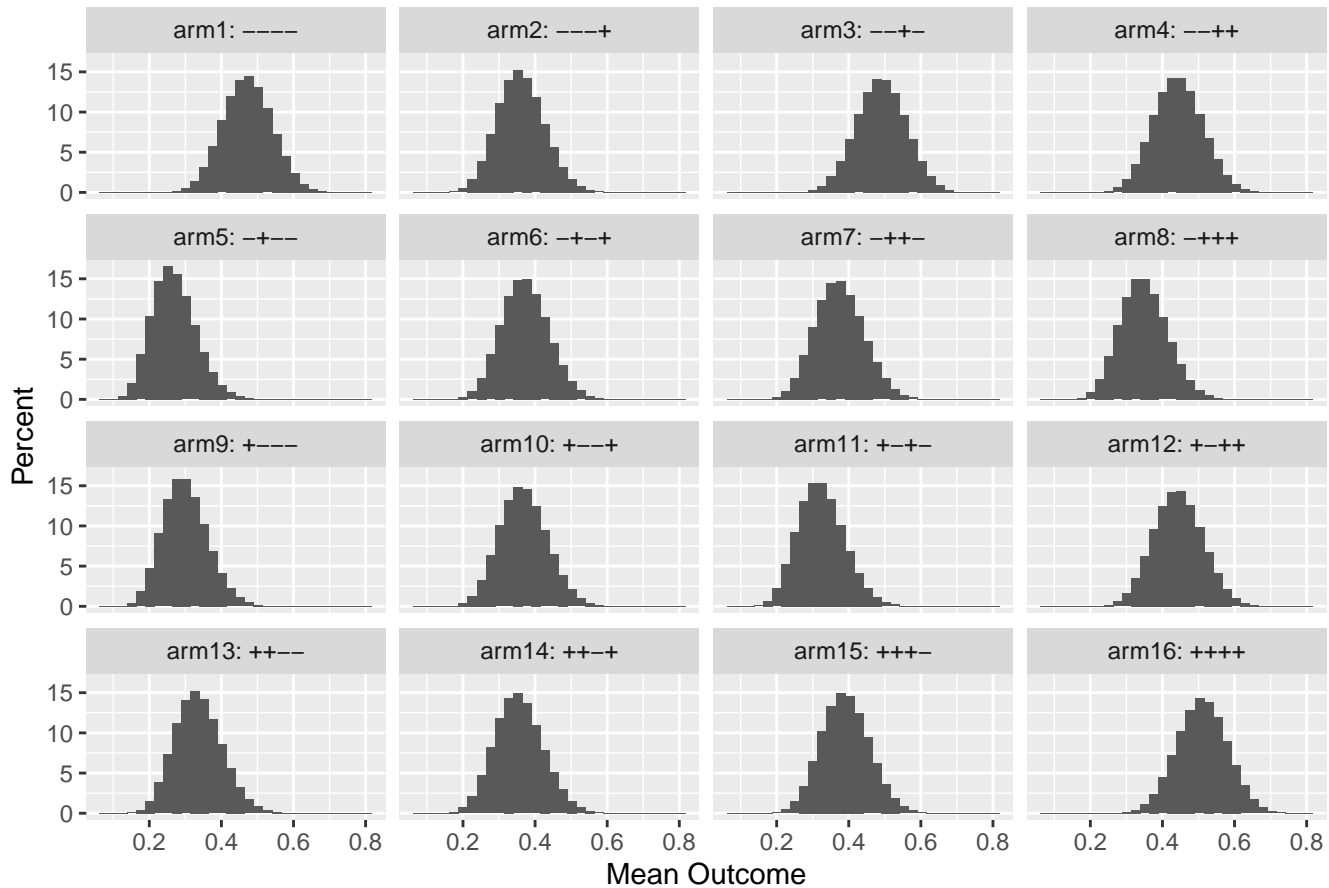

Supplement: jmir_v22i4e17734_app2.pdf [file jmir_v22i4e17734_app2.pdf]
